1 **Full Title: Experiences of children’s self-wetting (including incontinence) in Cox’s Bazar’s**  
2 **Rohingya refugee camps, Bangladesh**

3

4 **Short Title: Self-wetting by children in Cox’s Bazar’s Rohingya refugee camps**

5

6 Mahbub-UI Alam<sup>1, 2</sup>, Sudipta Das Gupta<sup>1</sup>, Claire Rosato-Scott<sup>2</sup>, Dewan Muhammad Shoaib<sup>1</sup>, Asmaul  
7 Husna Ritu<sup>1</sup>, Rifat Nowshin<sup>1</sup>, Md Assaduzzaman Rahat<sup>1</sup>, Nowshad Akram<sup>3</sup>, Joanne Rose<sup>4</sup>, Barbara E.  
8 Evans<sup>2</sup>, Dani J. Barrington<sup>2,5</sup>

9 1 Environmental Health and WASH Unit, Health Systems and Population Studies Division,  
10 International Center for Diarrhoeal Disease Research, Bangladesh (icddr,b), Dhaka 1212,  
11 Bangladesh;

12 2 School of Civil Engineering, University of Leeds, Leeds, LS2 9JT, United Kingdom;

13 3 World Vision Bangladesh, Cox’s Bazar, Bangladesh

14 4 Department of Health Science, University of York, York, United Kingdom

15 5 School of Population and Global Health, The University of Western Australia, Perth, Australia;

16

17 **Correspondence**

18 dani.barrington@uwa.edu.au

19

## 20 Abstract

21 Self-wetting, including incontinence, affects people of all ages, ethnicities, and cultural backgrounds,  
22 and can have a significant negative impact on quality of life. We thus explored the attitudes towards  
23 self-wetting and experiences of children (ages five to 11), their caregivers, and humanitarian experts  
24 in the Rohingya refugee camps in Cox's Bazar, Bangladesh.

25 We purposively selected participants from two camps where our partner organisation, World Vision  
26 Bangladesh - Cox's Bazar, works. We conducted Key Informant Interviews (KIIs) with community  
27 members and camp officials, Story Book (SB) sessions with Rohingya children and in-depth  
28 Interviews (IDIs) with caregivers of children who participated in the SB sessions, as well as surveying  
29 the communal toilets used by children of the caregivers.

30 Self-wetting was commonly seen among the children. Due to self-wetting, children were likely to feel  
31 embarrassed, upset and uncomfortable, and frightened to use the toilet at night; many also indicated  
32 that they would be punished by their caregivers for self-wetting. Key informants indicated that  
33 caregivers have difficulty handling children's self-wetting because they have a limited amount of  
34 clothing, pillows, and blankets, and difficulty cleaning these items. In the sanitation survey it was  
35 evident that the toilets are not appropriate and/or accessible for children.

36 Children in the Rohingya camps studied self-wet due to both urinary incontinence (when unable to  
37 reach a toilet in time) and because the sanitation facilities offered are inappropriate. They are teased  
38 by their peers and punished by their caregivers. The lives of children who self-wet in these camps  
39 could be improved by increasing awareness on self-wetting to decrease stigma and ease the concerns  
40 of caregivers, as well as increasing the number of toilets, ensuring they are well-lit, providing child-  
41 friendly toilets and cubicles, fixing the roads/paths that lead to sanitation to facilities and increasing  
42 the provision of relevant continence management materials.

## 43 Introduction

44           The medical condition of urinary incontinence (UI) is defined as the involuntary loss of urine  
45 [1], and it is a complex global health issue that has a negative impact on people’s security, dignity,  
46 rights and general quality of life [2, 3]. People who experience UI, and their caregivers, face  
47 challenges in their everyday lives, with individuals reporting that the intensity and complexity of the  
48 experience changes on a daily basis. Incontinence can also result in social and economic  
49 marginalization, debilitation, and psychosocial problems due to the associated stigma [4]. The  
50 stigmatization of UI prohibits individuals from sharing their difficulties with others, and because of  
51 that, they often separate themselves from society, community, and family [4].

52           Children aged between five and 11 years occasionally wet themselves as a result of the  
53 medical condition of UI; when this happens during sleep, it is referred to as enuresis [5]. Sometimes  
54 children of this age wet themselves because they do not want to, or cannot, access a toileting facility  
55 in time; not due to a physiological inability to stop urine leakage. This is known as social  
56 incontinence. The term ‘self-wetting’ can be used when a child wets themselves, but the cause is  
57 unknown. Regardless of whether self-wetting is physiological or due to a lack of appropriate facilities,  
58 the shame and humiliation linked with it can have an impact on relationships and involvement in  
59 social events, increasing the likelihood of psychological difficulties in childhood. Increased domestic  
60 violence towards children who experience enuresis has been observed [6] and children who self-wet  
61 can also suffer from skin rashes and Urinary Tract Infections (UTIs) [7]. The consequences of self-  
62 wetting mean that children who self-wet usually try to conceal the condition, although daytime UI is  
63 difficult to conceal, particularly where continence aids such as absorbent pads are not available [8].  
64 Children who do not achieve continence ‘on time’ (according to culturally specific expectations of  
65 achieving toilet training) can suffer long-term psychological issues [8].

66           Very little work has investigated the prevalence and experiences of self-wetting in low  
67 resource settings [3, 9], but the available data suggest that it is common around the world,  
68 regardless of culture, age and ethnicity [10-13], and that experiences in these settings are poor [14-  
69 17]. To the best of our knowledge, the prevalence of childhood self-wetting, including UI, has not  
70 been successfully measured in low resource settings, with a recent study that attempted to do so

71 noting that the stigma associated with self-wetting makes it a challenging task to identify children  
72 who experience it [18].

73 In humanitarian settings, self-wetting by all age groups often goes unnoticed [17]. Yet the  
74 incidence of UI may be higher in humanitarian settings because of situation-induced trauma, anxiety  
75 and physical harm [19, 20], and self-wetting generally due to the decreased lack of access to  
76 appropriate toileting facilities. For example, International Rescue Committee (IRC), Médecins Sans  
77 Frontières, International Federation of Red Cross and Red Crescent Societies (IFRC) and the United  
78 Nations High Commissioner for Refugees have observed an increase in bed-wetting among children in  
79 Syria, Lebanon, Iraq, Greece and Honduras since the onset of fighting and/or their displacement [17].  
80 Jurkovic, et al. (2019) found that refugee or displaced children have an increased risk of  
81 incontinence, which can cause further trauma in itself. Families in emergency situations face  
82 additional challenges in managing their children's self-wetting due to a lack of resources, including  
83 water and soap [17]. Self-wetting limits the accessibility of essential services (food, water, and health  
84 care) and the opportunity to participate effectively in decision-making processes, leading to further  
85 social marginalization and vulnerability [3, 9, 17].

86 There is a lack of knowledge on the challenges and obstacles that children who self-wet and  
87 their caregivers encounter in emergency settings, and how support to manage the condition can be  
88 effectively provided in the planning, implementation and assessment of humanitarian programming.  
89 Our study took a phenomenological approach using a Story Book (SB) methodology (development of  
90 the methodology is detailed in [21]) in-depth interviews and a sanitation survey based on the CHILD-  
91 SAN approach [22] to understand the barriers to inclusion and well-being that those living with self-  
92 wetting, particularly children aged five to 11 and their caregivers, face in the Rohingya refugee camps  
93 of Cox's Bazar, and how more holistic, effective and inclusive WASH and protection programming can  
94 be developed to support those who self-wet and their families.

95

## 96 Methods

97 We report this study in line with the consolidated criteria for reporting qualitative research  
98 [23] (checklist included as Supplementary Information 1).

99

### 100 Study Setting

101 This study was conducted in the Rohingya refugee camps of Cox's Bazar, Bangladesh, the  
102 world's largest refugee settlement, inhabited by over 950,000 refugees/Forcibly Displaced Myanmar  
103 Nationals. Children comprise more than half of the population, with those aged five to 11 years  
104 comprising 11% [24]. A concurrent study using the same methodology was conducted in refugee  
105 settlements in the Adjumani District of Uganda; results of that study are forthcoming.

106

### 107 Study Design

108 We used a phenomenological approach to understand lived experiences of children's self-  
109 wetting in this context. We undertook SB sessions with Rohingya children aged five to eleven years  
110 old, in-depth interviews (IDIs) with their caregivers, key informant interviews (KIIs) with community  
111 members (camp leaders, religious leaders and traditional healers) and camp officials (teachers,  
112 community health workers, child protection officers and WASH specialists) and surveyed sanitation  
113 facilities used by the children and their family members for their appropriateness to children of this  
114 age group [22]. We then triangulated across these methods to understand lived experiences and  
115 possible ways to improve them.

116 The SB methodology was developed by the research team to hear from children aged five to  
117 11 years old about how an imaginary 'hero' character, approximately their age and living in one of the  
118 Cox's Bazar camps, might experience self-wetting. Children were asked to express their  
119 understanding, experiences and feelings of facing self-wetting issues through their drawings and  
120 discussions. The methodology was developed using a participatory process with local  
121 contextualization and is discussed and evaluated elsewhere [21]. All of the data collection tools were

122 developed by the research team and Advisory Committee members (specialists on research with  
123 children, incontinence and emergency contexts) and then reviewed and finalized in coordination with  
124 the local research team in Bangladesh. Questions were translated into Bangla and then verbally  
125 adapted into the Rohingya language while conducting activities. All of the tools used are available in  
126 English and Bangla via the Open Science Framework [25].

127

## 128 Participant Recruitment

129 Two research sites (Site 1 and Site 2) were selected based on accessibility, availability of the  
130 children and caregivers and pre-existing relationships between the local research partner (World  
131 Vision Bangladesh - Cox's Bazar (WVB-CXB)) and the Rohingya community. Children known to self-  
132 wet were not purposively recruited, as the local research team believed this may increase stigma and  
133 potentially protection risks. Instead, interested children already known to WVB-CXB (and who may or  
134 may not self-wet) were invited to participate during a community visit, with the understanding that  
135 even children who do not self-wet may have insights into how those who do are treated (including by  
136 themselves) within their community. We conducted eight SB sessions with 48 children, one at each  
137 research site with girls aged five to seven years old, boys aged five to seven years old, girls aged  
138 eight to 11 years old, and boys aged eight to 11 years old. To understand the caregivers' experiences  
139 and understanding of self-wetting by children, we invited (face to face) 12 caregivers of children the  
140 SB moderator identified as likely experiencing self-wetting and a further 12 who likely were not, and  
141 interviewed them. These 24 caregivers were purposively selected from the eight SB sessions to  
142 represent children of different age groups and gender. To further understand the challenges of self-  
143 wetting in children and discuss possible solutions to issues raised during the IDIs and SB sessions, we  
144 conducted KIIs with individuals who are engaged in the day-to-day care of children living with self-  
145 wetting and/or directly involved in addressing issues of self-wetting based on their positions or roles.  
146 We invited three teachers, two Community Health Workers (CHWs), three camp leaders, one religious  
147 leader, two traditional healers, two child protection officers, and two WASH specialists face to face, by  
148 emails or by phone calls, and interviewed them as key informants (Table 1).

149 *Table 1: Overview of Participant Groups by data collection method*

| <b>Participant Group</b>              | <b>Data Collection Method</b> | <b>Site</b> | <b>Number of Activities</b> | <b>Male Participants</b> | <b>Female Participants</b> | <b>Total Participants</b> |
|---------------------------------------|-------------------------------|-------------|-----------------------------|--------------------------|----------------------------|---------------------------|
| Boys aged five to seven years old     | Story Book session            | 1           | 1                           | 6                        | 0                          | 6                         |
|                                       |                               | 2           | 1                           | 6                        | 0                          | 6                         |
| Girls aged five to seven years old    | Story Book session            | 1           | 1                           | 0                        | 6                          | 6                         |
|                                       |                               | 2           | 1                           | 0                        | 6                          | 6                         |
| Boys aged eight to eleven years old   | Story Book session            | 1           | 1                           | 6                        | 0                          | 6                         |
|                                       |                               | 2           | 1                           | 6                        | 0                          | 6                         |
| Girls aged eight to eleven years old  | Story Book session            | 1           | 1                           | 0                        | 6                          | 6                         |
|                                       |                               | 2           | 1                           | 0                        | 6                          | 6                         |
| Caregivers                            | IDI                           | 1           | 12                          | 0                        | 12                         | 12                        |
|                                       |                               | 2           | 12                          | 0                        | 12                         | 12                        |
| Teachers                              | KII                           | 2           | 2                           | 0                        | 2                          | 2                         |
|                                       |                               | 1           | 1                           | 0                        | 1                          | 1                         |
| Community Health Workers (CHW)        | KII                           | 1           | 2                           | 2                        | 0                          | 2                         |
| Camp Leaders (Majhi)                  | KII                           | 1           | 1                           | 1                        | 0                          | 1                         |
|                                       |                               | 2           | 2                           | 2                        | 0                          | 2                         |
| Religious Leaders                     | KII                           | 2           | 1                           | 1                        | 0                          | 1                         |
| Traditional Leaders                   | KII                           | 1           | 1                           | 1                        | 0                          | 1                         |
|                                       |                               | 2           | 1                           | 1                        | 0                          | 1                         |
| Camp Child Protection Officials (CPO) | KII                           | 2           | 2                           | 1                        | 1                          | 2                         |
| WASH Specialists                      | KII                           | 1           | 1                           | 1                        | 0                          | 1                         |
|                                       |                               | 2           | 1                           | 1                        | 0                          | 1                         |

150

## 151 Research Training

152 DJB (PhD, female, Lecturer in Global Health) and CRS (MSc, female, PhD candidate) led the  
153 project across both Uganda and Bangladesh, and recruited MUA (MPH and MSS, male, associate  
154 scientist) to oversee research training and data collection in Bangladesh due to his experience as a  
155 qualitative researcher in the field of WASH. MUA and SDG (MSS, male, research officer) provided  
156 three days of training to the six data collectors (three male and three female WVB-CXB staff who  
157 have experience conducting participatory discussions with children) on the background and purpose  
158 of the research and the principles of qualitative data collection, including the data collection  
159 techniques of KIIs, IDIs, the SB methodology and the sanitation survey, and ethical considerations.

160

## 161 Data Collection

162 The research team recruited participants and collected data from October 10 to October 25,  
163 2021. SDG and the WVB-CXB staff collected data in the local language/s. The SB sessions were  
164 facilitated by a data collector of the same gender as the children and took place in school classrooms;  
165 caregivers were sometimes visibly present but not within earshot of the children's discussions. The SB  
166 sessions took between 50 and 155 minutes. Caregivers were interviewed in their households, as per  
167 their preference. The KIIs took place at the individuals' work/living place, including formal  
168 workplaces, households, schools, and mosques, based on their preference. The IDIs and KIIs were  
169 between 30 and 60 minutes long. All SB sessions, IDIs and KIIs were audio recorded, and  
170 photographs of children's drawings taken during SB sessions. We also surveyed the sanitation  
171 facilities available to the children of the caregivers we interviewed. These children and their family  
172 members used these sanitation facilities on a daily basis. We visited the available communal  
173 sanitation facilities and assessed the status of accessibility issues, toilet walls, toilet roof, toilet door,  
174 door handle, door lock, handwashing water container, soap, hygiene promotion and available facilities  
175 within the toilets, using an observational checklist [25] (available at Barrington, 2023).

176



## 177 Ethical Considerations

178 This is a very sensitive topic, and from the outset we had to consider whether it was ethical  
179 to conduct such research at all in an emergency setting, particularly the Story Book sessions which  
180 involved children. For an in-depth discussion on our considerations and eventual decision to conduct  
181 the work see Supporting Information 1 of Rosato-Scott et al. [21]. Approval to conduct the project  
182 was granted by the Research Ethics Committee, Faculty of Engineering, University of Leeds, United  
183 Kingdom (Reference MEEC 19-020). Approval to conduct the research in Cox's Bazar was granted by  
184 the Institutional Review Board of the Institute of Health Economics (University of Dhaka,  
185 Bangladesh), with authority to access the refugee camps granted by the Office of the Refugee Relief  
186 and Repatriation Commissioner (RRRC). The research team explained to all participants that they  
187 wanted to better understand how children aged five to 11 years old experience self-wetting, and  
188 whether there are ways to improve these experiences (participant information sheets are available  
189 from [25]). We obtained verbal assent from the children for the SB sessions, and written consent  
190 from their caregiver. For the KIIs and caregiver IDIs, we obtained written or verbal (where a second  
191 data collector acted as a witness and signed the form) informed consent.

192

## 193 Data Analysis

194 All activities were transcribed and translated verbatim into English; participants were not  
195 asked to comment on or correct them. Data collectors did not take formal fieldnotes, but SDG  
196 debriefed the local research team daily and discussed potential probes for SB sessions and interviews  
197 that could be used to identify and explore emerging themes. MUA and SDG undertook initial data  
198 analysis during the data collection stage.

199 After the completion of data collection, following a deductive approach, MUA, SDG, DJB and  
200 CRS initially developed a coding framework based on the research objectives. Inductive codes were  
201 developed using constant comparative analysis as the work progressed. SDG, AHR, RN, and MAR  
202 coded all transcripts using NVivo 12 (QSR International), dividing them among themselves equally,  
203 and coding of all transcripts was then checked by DMS and MUA. Data were triangulated between the

204 data collection methods. Although it was originally planned that initial findings would be discussed  
205 with participants to incorporate their feedback into a final round of analysis, restrictions related to  
206 COVID-19 and the funding period meant this was not possible.

207

## 208 Results

209 The SB sessions, IDIs, KIIs and sanitation survey provided insight into three major facets of  
210 self-wetting by children in humanitarian contexts: the perceived causes of self-wetting, experiences of  
211 children and caregivers when managing the condition, and suggestions for reducing the incidence of  
212 self-wetting (See S2 Table for the full codebook).

213

### 214 Perceived causes of self-wetting in children

#### 215 Self-wetting as a 'disease' or a normal part of life

216 Participants indicated that the Rohingya community usually refer to self-wetting as "*Kora*",  
217 and it is common among children aged five to 11 years. Several participants, including caregivers (6  
218 of 24), CHWs (2 of 2), majhis (local leaders among Rohingyas, 2 of 2) and a religious leader (1 of 1),  
219 consider self-wetting and the medical condition of UI a 'disease'. As a group, they consider self-  
220 wetting a disease because they believe it needs treatment to be cured. Those caregivers who  
221 consider it a disease do so because children urinate in their sleep on a daily basis and continue to do  
222 so even after consulting with doctors or Hakeem. A CHW stated that "We call it [self-wetting] a  
223 disease because [we can see] when people or children sleep during the daytime and dream, they  
224 sometimes defecate/urinate in their sleep. Who [children] cannot control their urge to defecate,  
225 whether the toilet is far away or near, they urinate in bed or on clothes when they cannot control it.  
226 Others lose control on the way [to the toilets] because the bathroom is far away, unable to hold it all  
227 the way." (CHW 2) and one caregiver "If the child is sick, feels troubled, and urinates in bed, won't  
228 the mother feel troubled? He [the boy child] is urinating in bed because he has a disease." (Caregiver  
229 of Child 3 from SB Session 1).

230 A few caregivers (5 of 24), but several KIs (10 of 15), consider self-wetting a normal  
231 phenomenon which resolves with age. They feel that as children become older, they gain bladder  
232 control; children self-wet when they are still too young to sufficiently control their urine, not because  
233 they are ill. OneCHW and both CPOs believe children usually urinate in bed while deep asleep  
234 because they are dreaming of urinating in toilets. Children suggested that major reasons their heroes  
235 wet themselves at night are excessive intake of water before going to sleep (8 of 8 sessions), and an  
236 inability to control the urge to urinate while dreaming (4 of 8 sessions). None of the health care  
237 service providers, or the CPOs, are informed about the self-wetting issues of children as the issue is  
238 not reported to them by the community.

239

240 Available toilets are inappropriate

241 The most common reason participants mentioned for children self-wetting was that children  
242 consider the toilets available to them are inappropriate for their needs. Some of the caregivers  
243 mentioned that children are afraid to use the toilet at night because the toilets are dark (6 of 24), far  
244 away (12 of 24), dirty (5 of 24), and the roads to toilets are in a poor condition (10 of 24). A major  
245 reason children gave for their hero self-wetting was distance from the toilet (5 of 8 sessions). From  
246 the sanitation survey, it was evident that the communal toilets available to the children participants  
247 are not all appropriate. We only deemed 4 of the 24 toilets 'child friendly'. Nine of the toilets are  
248 missing door handles and 20 do not have locks. Caregivers reported that the toilets are also  
249 frequently broken and the doors need to be closed using wire, which discourages children. As a result  
250 of the many inappropriate aspects of the sanitation available to them, children often urinate or  
251 defecate in their bed or on themselves or their mat. The sanitation survey also revealed that the  
252 majority of the toilets are far from households, taking five to ten minutes to get to, and require  
253 crossing a sloppy, muddy road. There is no signage to ten of the toilets and difficult-to-see signage  
254 for the other 14. Most of the paths (23 of 24) to the toilets do not have any lighting.

255 In all the SB sessions the children indicated that their hero did not feel comfortable and safe  
256 using the toilet. One girl aged eight to 11 years explained that their hero wet the bed because "The  
257 latrine is far away; it is scary to go there. That is why it [hero] is late to go there." (SBSession 6).

258 Caregivers stated that "Child feels scared to go to the bathroom at night; there are no lights. The  
259 road to the toilet is not good either; the road is dark." (Caregiver of Child 4 from SB Session 6) and  
260 "The path to the toilet is not friendly. Now where it is, it is pretty low [in position/placement]. Now  
261 which [the new toilets] are going to be newly formed, those should be formed in plain land. Then  
262 there will be no more difficulties, and the kids will not fall anymore. But the kids are suffering there  
263 now". (Caregiver of Child 4 from SB Session 2).

264 Caregivers (13 of 24) observed that even when children can reach the toilet they often do not  
265 use the toilet because they are generally not child friendly. Children aged five to 11 years cannot sit  
266 properly on the toilet seat and face problems in using the water for anal cleansing and flushing. One  
267 WASH specialist explained that "latrine's size, pan's size, people's structures, 5 feet, 6 feet, like this.  
268 But children's body structure is small. If their pan is 34 inches, 8 inches on this side, they cannot sit  
269 with two feet on two sides. It becomes difficult. If we make a child sit on an adult's pan, then s/he  
270 will not be able to do it properly. If his legs are spread too wide, he won't feel that pressure." (WASH  
271 Specialist 1).

272 Each block in the Rohingya camps has one toilet that is shared by four or five households,  
273 resulting in lengthy wait periods that further deter children from using them. Caregivers (9 of 24)  
274 mentioned that sometimes, children have to wait for their turn to access the toilet while adults are  
275 using it, meanwhile urinating while unable to hold it. Some of the service providers (4 of 10)  
276 confirmed that a long waiting time to get to the toilet is one of the significant causes of self-wetting  
277 by children. In addition, because of the volume of users, the available toilets are unclean and children  
278 do not want to use them. As two caregivers stated "This latrine becomes very unclean. There are a  
279 lot of people here. There are 8/10 people or 10/12 people in each family. For this, the latrine  
280 becomes very unclean. We have to clean it; it smells bad if we don't clean it. That's why we have to  
281 clean it. Children don't want to use it if it's unclean." (Caregiver of Child 4 from SB Session 6) and "I  
282 thought it would be nice to have another latrine for the children. We [the adults] use this latrine,  
283 [along with] 3/4 families, together. they [children] don't want to go to unclean latrines." (Caregiver of  
284 Child 3 from SB Session 5).

285

286 Experiences of self-wetting in children

287 Children are likely distressed when they self-wet

288 In all of the SB sessions children indicated that their heroes felt uncomfortable, angry,  
289 scared, tense, and embarrassed after self-wetting. It seemed that through their drawings the children  
290 were expressing their own feelings about self-wetting (regardless of whether it is something they  
291 experience or not). The children often stated that their hero cried and felt distressed after an  
292 incident. One of the main reasons their heroes were scared is that they believed their (heroes')  
293 mother would scold them because she was upset, furious, sad and/or embarrassed (7 out of 8 SB  
294 sessions). For example:

295 *"Facilitator: How does your heroine feel when her clothes get wet, dear?"*

296 *Respondent 1: She feels troubled. And also feels scared that her clothes were wet,*  
297 *her mother would scold her.....*

298 *Respondent 2: She urinates in bed; that's why she feels terrible and ashamed.....*

299 *Respondent 3: She feels sad."*

300 *(SB Session 6)*

301 The children particularly illustrated this when discussing or drawing what would happen when  
302 their heroes got out of bed in the morning and had wet themselves. They indicated that caregivers  
303 sometimes slap the children or beat them with whatever they can find nearby, such as a broom or  
304 stick (discussed in 6 of 8 SB sessions), or by grabbing their hair (5 of 8 SB sessions) (Figures 1 and  
305 2). Some children chose to disclose that this had happened to them.

306 *"Facilitator: Suppose one day, the heroine accidentally urinated and wet the bed.*

307 *How will she feel?"*

308 *Respondent 3: She will be ashamed.*

309 *Respondent 1: She will be scared.*

310 *Facilitator: You said that the heroine does not feel good; she cries, she feels*  
311 *scared and sad. Why does she feel like this?*

312 *Respondent 1: Her mother will beat her."*

313 *(SB Session 3)*

314

315

316 ***Figure 1: Drawing of the hero's mother scolding the child, crying and beating the child***  
317 ***with a broom, as well as the hero crying. Story Book Session 6, Girls 8 to 11 Years Old,***  
318 ***Site 01 (Authors' own photograph)***

319

320

321 ***Figure 2: Drawing of a mother hitting the hero for self-wetting, being tense and being***  
322 ***angry. Story Book Session 1, Boys five to eight years old, Site 2 (English words added by***  
323 ***data collector from description provided by illustrator) (Authors' own photograph)***

324

325 In half of the SB sessions children mentioned that teachers and classmates mock and ridicule  
326 children who self-wet during school. Children explained that sometimes teachers are compassionate  
327 and advise students to go home and change their clothes after urinating in them, but others  
328 frequently become angry and beat the students for making their clothes wet at school (4 of 8 SB  
329 sessions). They either remove those children from school or call their fathers.

330 *"Facilitator: She (heroine) urinated after going to school. What will everyone in the*  
331 *school do? What will the teacher do?*

332 *Respondent 1: They will make her feel ashamed."*

333 *(SB Session 6)*

334

335 *"Respondent 1: The teacher beat him (hero).*

336 *Facilitator: The teacher beat him. Didn't the teacher do anything else?*

337 *Respondent 3: The teacher drove him away. The teacher kicked him out of school."*

338 *(SB Session 7)*

339

340 It is challenging for some caregivers to manage their children's self-wetting

341 Dealing with their children's self-wetting issues makes some caregivers anxious (5 of 24),  
342 uncomfortable (4 of 24), and ashamed (2 of 24). When children urinate or defecate in their clothes or  
343 bedding, caregivers (particularly mothers) are normally the ones who wash the clothes and linen,  
344 which annoys them and sometimes results in punishment of the children; "My son is urinating and  
345 defecating; I have trouble washing their clothes. I beat the children and changed their clothes. I feel  
346 sad about that." (Caregiver of Child 5 from SB Session 6). In the community, children who experience  
347 self-wetting and their parents feel ashamed as they face humiliation from the community because of  
348 their children's open urination and defecation.

349 Some caregivers (3 of 24) mentioned the burden of managing their children's self-wetting.  
350 They have to fetch water from a distance to clean the clothes and the child because there is no well  
351 near their homes. One CPO, one CHW and one religious leader also mentioned that the lack of water  
352 availability nearby, due to the humanitarian context, likely contributed to this stress. Several service  
353 providers (4 out of 10) mentioned that caregivers face challenges in managing children's self-wetting  
354 as they have a limited amount of clothes, pillows, and blankets, and if anyone urinates or defecates  
355 on the beds, they face problems using and cleaning these.

356

357 Caregivers of children who self-wet seek help

358 To treat self-wetting, caregivers usually do or would seek help, either from religious leaders  
359 (Moulovi) (19 of 24) or doctors (12 out of 24). Many caregivers (9 of 24) prioritize traditional/spiritual  
360 healers over doctors. The spiritual healers or 'Moulovis' recite the Quran, provide amulets, sacred

361 water, or oil to treat this incontinence issue. As one caregiver explained "Parents have two ideas  
362 [when observing incontinence]. I think it would be better to go to the doctor first. [However,] another  
363 idea is that [going to the religious leaders]. They believe it happens because of dreams or  
364 supernatural jinn ghosts. " (Caregiver of Child 3 from SB Session 1).

365

## 366 [Suggestions for reducing self-wetting](#)

### 367 [Participants believe that self-wetting can be prevented](#)

368 A few of the caregivers (4 of 24) felt that self-wetting could be prevented if there was better  
369 access to doctor's treatments in the camps. The children suggested that to prevent self-wetting their  
370 heroes could drink less water (4 of 8 SB sessions) and/or urinate before going to sleep at night (4 of  
371 8 SB sessions).

372 The majority of other recommendations of participants were around improving WASH  
373 facilities. Caregivers and key informants suggested that to decrease self-wetting more toilets should  
374 be built in general (4 out of 24 caregivers, 9 of 18 KIs), and these should be well built (6 of 24  
375 caregivers, 7 of 18 KIs), nearer to households (6 of 24 caregivers, 9 of 18 KIs), have water available  
376 and the roads or trails to them improved (3 of 24 caregivers, 8 of 18 KIs), with availability of lights at  
377 night (6 of 24 caregivers, 8 of 18 KIs). A CHW (1 of 2) and CPO (1 of 3) suggested providing torches  
378 for children to use at night when walking to the communal toilets.

379 Children in half of the SB sessions felt that more toilets needed to be built closer to or in  
380 homes. Some caregivers (4 of 24) and two Majhi (2 of 3) suggested providing a small area at the  
381 household for the children to urinate and defecate, "Even if you cannot arrange a bathroom, there  
382 should be a small place for the children (at their house) to urinate and defecate. For example, if the  
383 older adults cannot go out, their toilet chairs are arranged." (KII\_School\_Teacher\_03).

384 Both WASH specialists suggested that smaller commodes (e.g., smaller pan) should be  
385 provided for children so that they can use toilets more easily; "small pans need to be done for  
386 children so that s/he can sit comfortably." (Wash Specialist 1)



387

## 388 Discussion

389 Self-wetting can lead to negative physical [7], social [2, 3] and mental [6, 8] health impacts,  
390 particularly for children. Our study revealed that the uncomfortableness and embarrassment the  
391 children face because of wetting their clothes and bedding through accidental urination and  
392 defecation lead them to be angry, scared and tense. Children are often afraid of their mother's  
393 rebuking and being beaten because of wet clothes. A study conducted in Brazil showed that 89% of  
394 the participating children experiencing continence issues were abused verbally while 49% were  
395 punished physically, and in 88% of the cases the primary abuser was their mother [26]. Children also  
396 experience reduced sleep quality because of the anxiety and fear of possibility that they might leak  
397 during sleep [27].

398 The frequent urination or defecation of children in bed at night also contributes to feelings of  
399 the caregivers being upset, furious, sad, and embarrassed. The caregivers face humiliation from the  
400 neighbors and community members because of their children's self-wetting. This feeling can lead  
401 them to punish the children, as has been observed elsewhere [9].

402 Findings from this study highlight the difficulties children who self-wet and their caregivers  
403 face in their personal, social, and academic life as a result of the concealed nature and stigma  
404 surrounding these issues. The abuse associated with incontinence that the children face in the form  
405 of mockery and ridicule from teachers and classmates impacts them. Stigma results in  
406 embarrassment and shame, which discourages children from participating in program, educational  
407 and social activities [28, 29].

408 The children also face physical violence from some teachers because they wet their clothes at  
409 school, which makes some teachers angry, whilst other teachers advise children to change their  
410 clothes or go home. It has been demonstrated elsewhere that children are often at risk of abuse from  
411 teachers because of self-wetting [6].

412 Through this research we have developed a causal model to explain how these negative  
413 wellbeing impacts occur through children's, caregivers and key informants' experiences of self-wetting

414 in the Rohingya refugee camps (Figure 3). There are three 'pain points' in the model where we  
415 believe WASH and protection practitioners can remove or reduce factors which contribute to poor  
416 well-being, thus improving the experiences of children and their caregivers. These are improving  
417 WASH facilities, providing continence management supplies and increasing knowledge of self-wetting  
418 whilst reducing stigma. Medical intervention may also be required in some instances, but this should  
419 be delivered by health specialists, not WASH and protection practitioners.

420

421 ***Figure 3: Model of self-wetting experiences of children aged 5-11 years in Rohingya***  
422 ***refugee camps.***

423

#### 424 [Water, Sanitation and Hygiene facilities](#)

425 The accessibility issues at and leading to the communal ablution blocks contribute to children  
426 experiencing self-wetting, particularly social incontinence. Some of the major reasons for self-wetting  
427 are that toilets are far away, roads leading to the toilets are not well maintained, there is a lack of  
428 signage and navigation, and there is a lack of safety walking to and at the communal ablution blocks,  
429 making children afraid to go to and use them. The toilets used by the children in the study are also  
430 not child-friendly. There are not enough facilities and they have not been designed with children in  
431 mind. Ullah [30] reported this over a decade ago in older sections of the Rohingya refugee camps.

432 Studies elsewhere have investigated links between children's social incontinence and toileting  
433 infrastructure. These have indicated that increasing the number of bathrooms, establishing child-  
434 friendly toilets, ensuring water availability and improving accessibility on the approach to ablution  
435 blocks can encourage children to use facilities, thus reducing social incontinence. For example, a  
436 study in the USA found that children who do not have accessible toilets at school are 2.2 times more  
437 likely to experience social incontinence than children to have access to accessible toilets [31]. A study  
438 in Kenya showed that improvement to school toilet facilities increased the daytime toilet use of  
439 children [32].

440

#### 441 Availability of continence management supplies and washing facilities

442 Our study found that caregivers are busy managing children's self-wetting and have to fetch  
443 water from a distance to wash clothes and bedding, making them feel depressed, irritated, bothered  
444 and restless. This is a common experiences of caregivers of people who self-wet in emergency  
445 contexts [18].The limited availability of clothes, blankets and diapers made it more challenging for  
446 caregivers to manage the leakage issues of children. There is a need for humanitarian actors to more  
447 thoughtfully provide non-food items such as mattress protectors, portable toilets for children, and  
448 extra soap to the families who have children who self-wet. Médecins Sans Frontières, IRC and IFRC  
449 have found the provision of such materials useful to caregivers of children who self-wet in Syria, Iraq,  
450 Greece and Honduras [17].

451

#### 452 Knowledge on self-wetting and stigma

453 The diverse conceptualization and perception of self-wetting and incontinence impact their  
454 management in Rohingya camps. Incontinence is considered a disease among the Rohingya  
455 community because the leakage of urination and defecation while sleeping is evident even after the  
456 consultation with doctors or *Hakeem*. However, prevalence of self-wetting declines with age,  
457 reaching a prevalence of 0.5-1.7% by age 16–17 years, with spontaneous cure rates of about 15%  
458 yearly between 7 and 12 years and 11% annually between 12 and 17 years [33, 34]. But in  
459 emergency settings and LMICs, knowledge about incontinence of both caregivers and health workers  
460 is still at an introductory level [3, 17]. We also found that caregivers often do not report self-wetting  
461 issues to health and other support workers due to social stigma [18]. Where they are able to hide  
462 self-wetting, children often do not inform their caregivers, as has been seen in the Butajira region of  
463 southern Ethiopia [9].

464 To reduce stigma, physical and mental abuse towards children, improve the understanding of  
465 continence issues, and prioritise useful interventions by humanitarian actors, there is a need to focus  
466 on providing more knowledge to caregivers, children, communities and professionals. A study in Brazil  
467 found that caregivers with more education are less likely to severely punish children who self-wet

468 [26]. Humanitarian professionals across the globe have called for further knowledge and training on  
469 how to address continence issues in emergency contexts [17].

470

## 471 [Medical intervention](#)

472 While social incontinence may not need medical intervention (unless there are associated  
473 mental health concerns), incontinence that is caused by physical and/or mental health issues may.  
474 WASH and protection practitioners are unlikely to be able to directly address the needs of children  
475 with incontinence, and should leave this to medical professionals (providing referrals to such services  
476 and information where possible). However, providing accessible WASH facilities may assist in  
477 removing some of the barriers to children experiencing incontinence, for example, by reducing the  
478 time it takes for them to access a suitable toilet.

479

## 480 [Limitations](#)

481 Our study only included children and their caregivers in two Rohingya camps. However, the  
482 camps we chose broadly represented the living situation of most of the Rohingya community, and we  
483 also conducted interviews with diverse stakeholders who have a robust understanding of the situation  
484 across the Cox's Bazar camps. Our study did not investigate medical treatment of children with  
485 incontinence, and thus did not include health specialists.

486

## 487 [Conclusion](#)

488 Children living in the Rohingya refugee camps experience self-wetting due to both social and  
489 medical incontinence. This study is the first of its kind to speak to both children and their caregivers  
490 about this issue, eliciting valuable information on their experiences, as well as suggestions for  
491 practical changes. Protection and WASH professionals in emergency settings can better support  
492 children and their caregivers through the provision of accessible, close-to-household child-friendly

493 sanitation, providing extra continence management materials such as soap, pads/nappies and  
494 mattress protectors, and by both upskilling in their own knowledge around continence issues and  
495 communicating this to communities, assisting in better understanding and stigma reduction.

496

## 497 Acknowledgements

498 The RT would like to acknowledge the many individuals and organisations who contributed to  
499 the completion of this project, particularly research trainers and data collectors, administrative staff at  
500 all organisations, ethical application reviewers and the project's Advisory Board. Most importantly they  
501 would like to thank the children who participated in the Story Book sessions and their caregivers.

502

503

## 504 References

- 505 1. Demaagd, G.A. and T.C. Davenport, *Management of urinary incontinence*. P t, 2012. **37**(6): p.  
506 345-361h.
- 507 2. Pizzol, D., et al., *Urinary incontinence and quality of life: a systematic review and meta-*  
508 *analysis*. Aging clinical and experimental research, 2021. **33**: p. 25-35.
- 509 3. Rosato-Scott, C., et al., *Incontinence: we need to talk about leaks*. 2020.
- 510 4. Garcia, J.A., J. Crocker, and J.F. Wyman, *Breaking the cycle of stigmatization: managing the*  
511 *stigma of incontinence in social interactions*. Journal of Wound Ostomy & Continence Nursing,  
512 2005. **32**(1): p. 38-52.
- 513 5. Gomez Rincon M, Leslie SW, and L. S. *Nocturnal Enuresis*. StatPearls 2022 [cited 2023;  
514 Available from: <https://www.ncbi.nlm.nih.gov/books/NBK545181/>.
- 515 6. Can, G., et al., *Child abuse as a result of enuresis*. Pediatrics international, 2004. **46**(1): p. 64-  
516 66.
- 517 7. Thom, D.H. and J.S. Brown, *Reproductive and hormonal risk factors for urinary incontinence in*  
518 *later life: a review of the clinical and epidemiologic literature*. J Am Geriatr Soc, 1998. **46**(11):  
519 p. 1411-7.
- 520 8. Grzeda, M.T., et al., *Effects of urinary incontinence on psychosocial outcomes in adolescence*.  
521 Eur Child Adolesc Psychiatry, 2017. **26**(6): p. 649-658.
- 522 9. Hafskjold, B., et al., *Taking Stock: Incompetent at incontinence—why are we ignoring the*  
523 *needs of incontinence sufferers?* Waterlines, 2016: p. 219-227.
- 524 10. Mostafaei, H., et al., *Prevalence of female urinary incontinence in the developing world: A*  
525 *systematic review and meta-analysis—A Report from the Developing World Committee of the*  
526 *International Continence Society and Iranian Research Center for Evidence Based Medicine*.  
527 Neurourology and urodynamics, 2020. **39**(4): p. 1063-1086.
- 528 11. Minassian, V.A., H.P. Drutz, and A. Al-Badr, *Urinary incontinence as a worldwide problem*.  
529 International Journal of Gynecology & Obstetrics, 2003. **82**(3): p. 327-338.
- 530 12. Walker, G.J. and P. Gunasekera, *Pelvic organ prolapse and incontinence in developing*  
531 *countries: review of prevalence and risk factors*. International urogynecology journal, 2011.  
532 **22**: p. 127-135.
- 533 13. Paul Abrams, L.C., Adrian Wagg, Alan Wein (Eds),, *Incontinence*. 2017, ICI-ICS. International  
534 Continence Society: Bristol UK.
- 535 14. Wilbur, J., et al., *"I'm scared to talk about it": exploring experiences of incontinence for people*  
536 *with and without disabilities in Vanuatu, using mixed methods*. The Lancet Regional Health-  
537 Western Pacific, 2021. **14**: p. 100237.
- 538 15. Rosato-Scott, C.A. and D.J. Barrington, *Incontinence in Zambia: initial investigation into the*  
539 *coping strategies of sufferers and carers*. Waterlines, 2018. **37**(3): p. 190-206.
- 540 16. Ansari, Z. and S. White, *Managing incontinence in low-and middle income-countries: A*  
541 *qualitative case study from Pakistan*. PLOS ONE, 2022. **17**(7): p. e0271617.
- 542 17. House, S., Chatterton, C., *Mapping of support for people living with incontinence in*  
543 *humanitarian contexts, Through the lens of WASH, GBV and ASRH*. 2022, Norwegian Church  
544 Aid
- 545 18. Rosato-Scott, C.A., et al., *Urinary incontinence in children aged 5 to 12 in an emergency setting:*  
546 *lessons learned in Ethiopia*. Waterlines, 2021. **40**(3): p. 179-191.
- 547 19. Chess-Williams, R., et al., *Chronic psychological stress and lower urinary tract symptoms*. LUTS:  
548 Lower Urinary Tract Symptoms, 2021. **13**(4): p. 414-424.
- 549 20. Jurković, M., et al., *Refugee status as a possible risk factor for childhood enuresis*. International  
550 Journal of Environmental Research and Public Health, 2019. **16**(7): p. 1293.

- 551 21. Rosato-Scott, C., et al., *Understanding children's experiences of self-wetting in humanitarian*  
552 *contexts: An evaluation of the Story Book methodology*. PLOS Global Public Health, 2023. **3**(5):  
553 p. e0001194.
- 554 22. Rosato-Scott, C., B.E. Evans, and D.J. Barrington, *CHILD-SAN: a new disability-inclusive*  
555 *framework for emergency sanitation for children aged five to 11, based on a systematic review*  
556 *of existing guidance*. Journal of International Humanitarian Action, 2021. **6**: p. 1-14.
- 557 23. Tong, A., P. Sainsbury, and J. Craig, *Consolidated criteria for reporting qualitative research*  
558 *(COREQ): a 32-item checklist for interviews and focus groups*. International Journal for Quality  
559 in Health Care, 2007. **19**(6): p. 349-357.
- 560 24. UNHCR, *Joint Government of Bangladesh - UNHCR Population Factsheet*. . 2022.
- 561 25. Barrington, D., *Understanding children and their caregivers' experiences with incontinence in*  
562 *humanitarian contexts*. 2023.
- 563 26. Sapi, M.C., et al., *Assessment of domestic violence against children and adolescents with*  
564 *enuresis*. Jornal de Pediatria, 2009. **85**: p. 433-437.
- 565 27. Gozmen, S., S. Keskin, and I. Akil, *Enuresis nocturna and sleep quality*. Pediatric Nephrology,  
566 2008. **23**: p. 1293-1296.
- 567 28. Rosato-Scott, C., et al., *Guidance on supporting people with incontinence in humanitarian and*  
568 *low-and middle-income contexts (LMICs)*. 2019.
- 569 29. Filce, H.G. and L. LaVergne, *Absenteeism, educational plans, and anxiety among children with*  
570 *incontinence and their parents*. Journal of School Health, 2015. **85**(4): p. 241-250.
- 571 30. Ullah, A.A., *Rohingya Refugees to Bangladesh: Historical Exclusions and Contemporary*  
572 *Marginalization*. Journal of Immigrant & Refugee Studies, 2011. **9**(2): p. 139-161.
- 573 31. Bloom, D.A., et al., *Toilet habits and continence in children: an opportunity sampling in search*  
574 *of normal parameters*. The Journal of urology, 1993. **149**(5): p. 1087-1090.
- 575 32. World Bank, *Improving health, nutrition and population outcomes in Sub-Saharan Africa: the*  
576 *Role of the World Bank*. 2004: The World Bank.
- 577 33. Morison, M., H. Staines, and A. Gordon. *A Systematic review of the prevalence of Nocturnal*  
578 *Enuresis in children and young people aged 5-18 years and its social impact on the individual*  
579 *and the Family*. in *Neurourology and Urodynamics*. 2004. Wiley-Liss Div John Wiley & Sons inc,  
580 111 river st, Hoboken, NJ 07030 USA.
- 581 34. Abrams, P., Cardozo, L, Wagg, A, Wein, A., ed. *Incontinence 6th Edition*. 2017, International  
582 Continence Society.

583

## 584 **S1. COREQ (COnsolidated criteria for REporting Qualitative research) Checklist**

## 585 **S2. Full codebook**

A-2.3

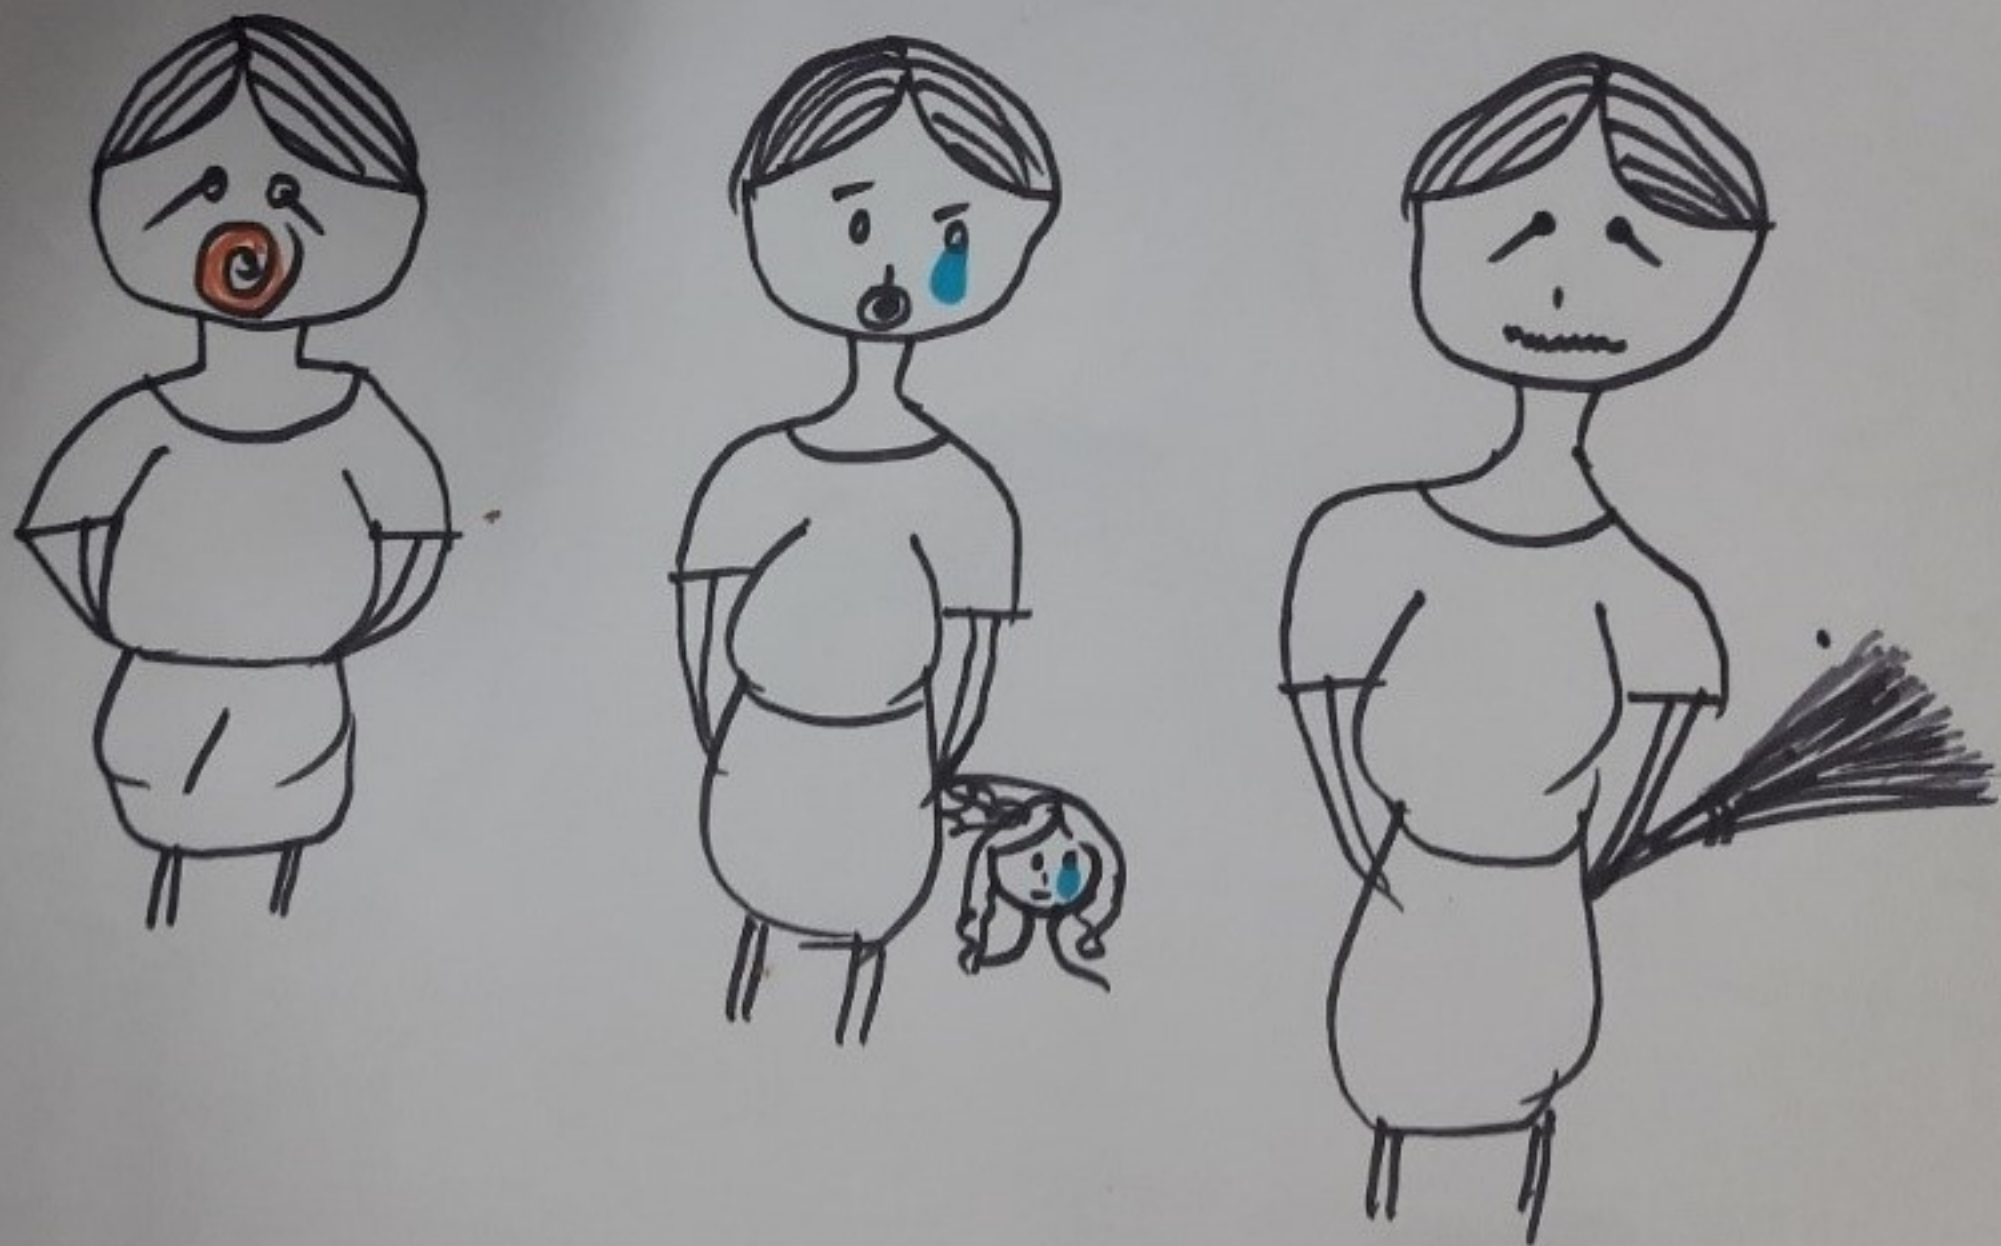

Figure 1



Activity - 2.3

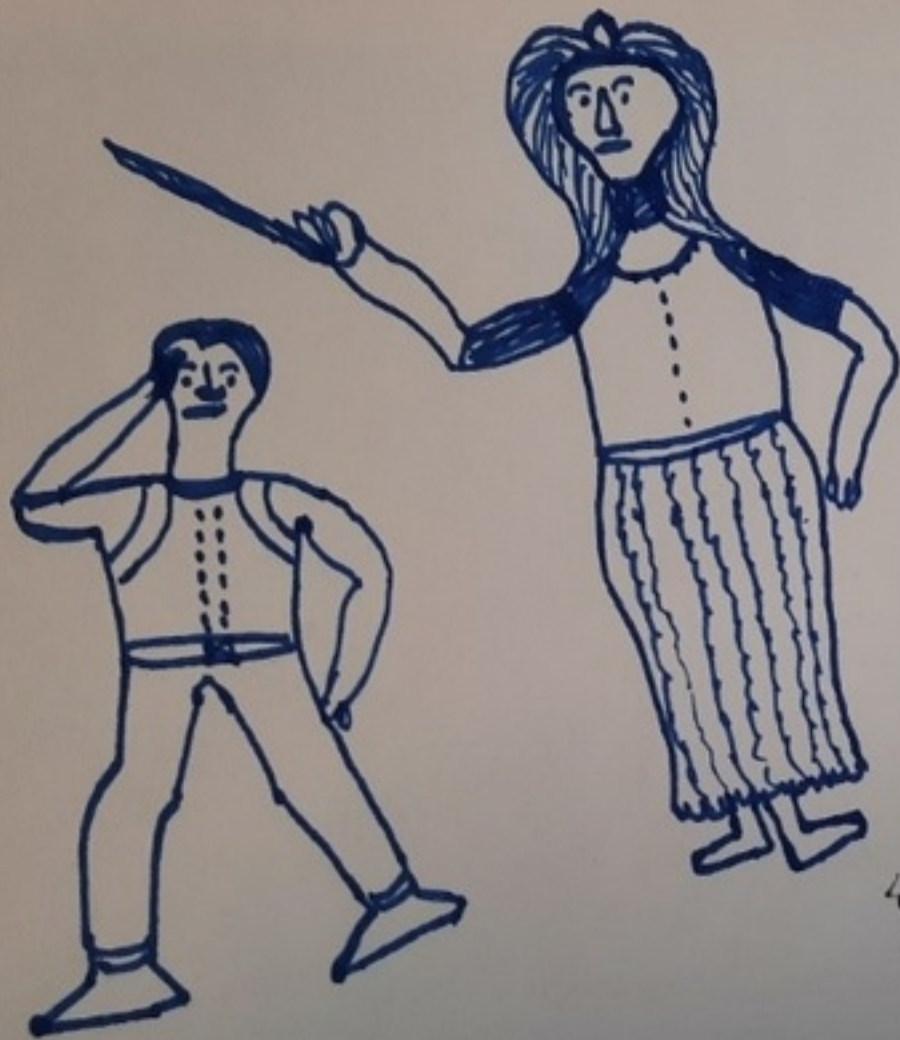

Beating

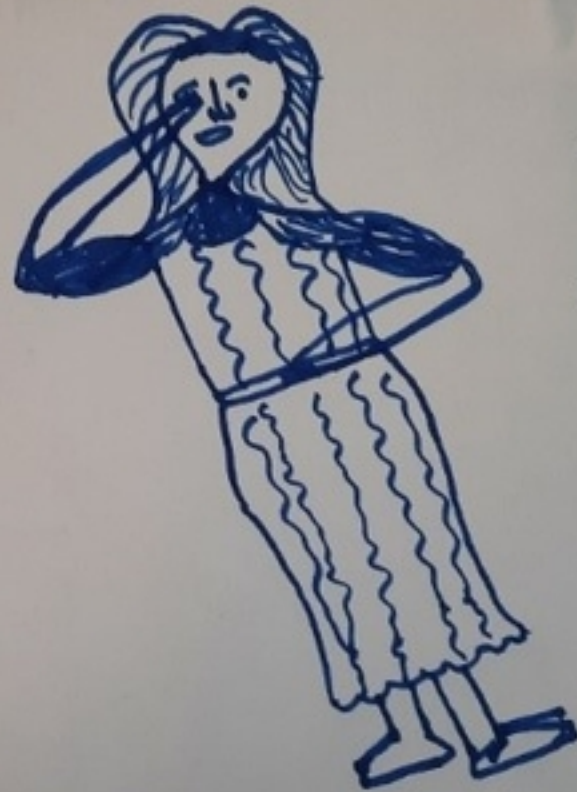

Feeling Tensed

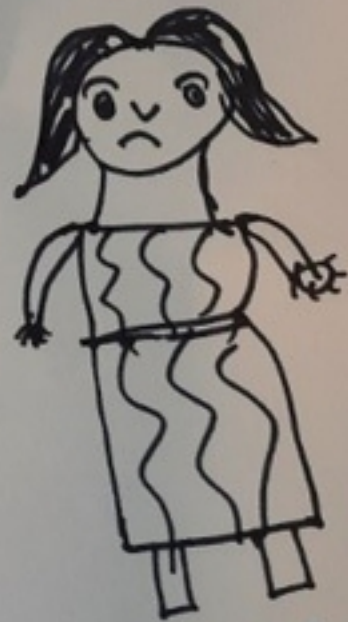

Feeling  
Angry

Figure 2

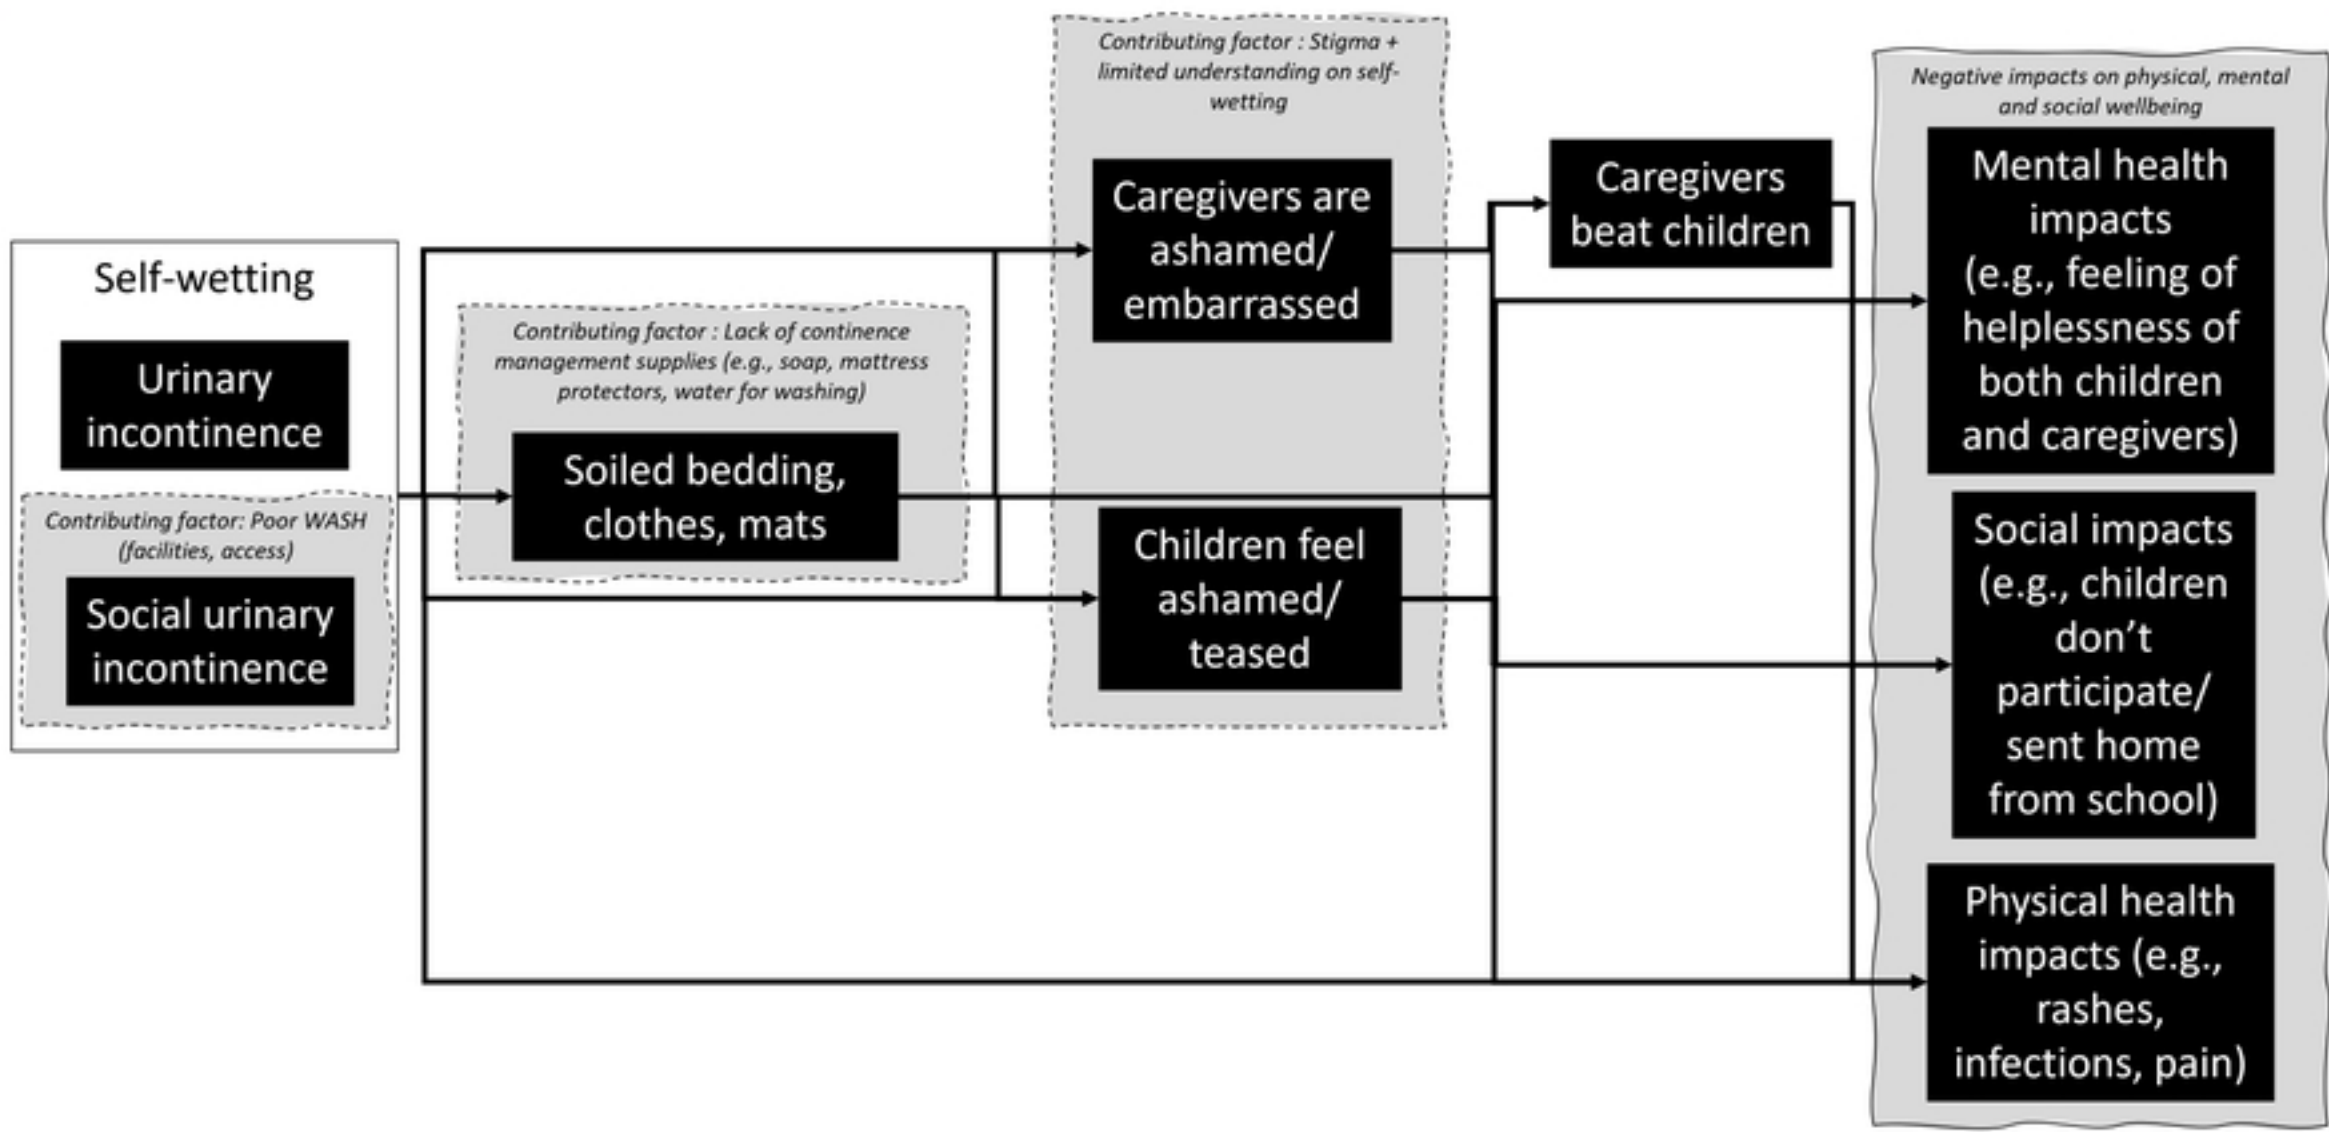

Figure 3
